# Supplementary material for: A novel colorimetric potassium sensor based on the substitution of lead from G-quadruplex
Source: Royal Society of Chemistry journal article supplement (doi:10.1039/c2an36564b), 2012-11-19
Supplement: c2an36564b.pdf [file c2an36564b.pdf]

## Supporting Information

### A Novel Colorimetric Potassium Sensor Based on the Substitution of Lead from G-Quadruplex

Huijiao Sun<sup>a</sup>, Xiaohong Li<sup>a\*</sup>, Yunchao Li<sup>a</sup>, Louzhen Fan<sup>a</sup>, Heinz-Bernhard Kraatz<sup>b\*</sup>

<sup>a</sup>College of Chemistry, Beijing Normal University, Beijing, China, 100875

<sup>b</sup>Department of Physical and Environmental Sciences, University of Toronto Scarborough, 1265 Military Trail, Toronto, M1C 1A4, Canada.

### Supplementary figures and discussion

To confirm almost all hairpin DNA 1 transforms to Na<sup>+</sup>-stabilized G-quadruplex, the properties of denatured hairpin DNA 1 are tested by CD and UV-Vis measurements and compared with that of hairpin DNA. The results are shown in Fig. S1. It is observed that similar CD spectra and UV-Vis absorption spectra are obtained for hairpin DNA 1 and denatured hairpin DNA 1, which demonstrates almost all hairpin DNA 1 transforms to Na<sup>+</sup>-stabilized G-quadruplex in the presence of 140 mM Na<sup>+</sup>.

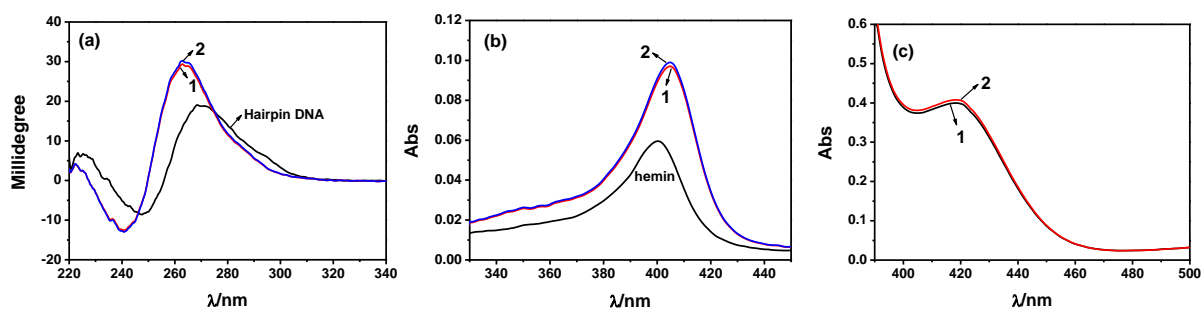

Fig. S1. Properties of hairpin DNA 1 and denatured hairpin DNA 1 in 20 mM Tris-ClO<sub>4</sub> buffer (pH = 7.4) containing 140 mM Na<sup>+</sup>: (1) hairpin DNA 1; (2) denatured hairpin DNA 1. (a) CD spectra; (b) UV-vis absorption spectra of 1 μM hemin in the absence and presence of hairpin DNA 1; (c) UV-Vis absorption spectra of the peroxidation product (ABTS<sup>•-</sup>) at 5 min of the ABTS-H<sub>2</sub>O<sub>2</sub> reaction in the presence of 0.1 μM hemin.

In the presence of 140 mM Na<sup>+</sup> (2 h), the hairpin DNA 1 transforming to Na<sup>+</sup>-stabilized G-quadruplex as illustrated in Fig. S2. In comparison with Na<sup>+</sup>, K<sup>+</sup> has a higher efficiency with regard to stabilizing G-quadruplex due to the K<sup>+</sup>-stabilized G-quadruplexes more compact than

that  $\text{Na}^+$ -stabilized ones.<sup>1</sup> Thus,  $\text{Na}^+$ -stabilized G-quadruplex converts to  $\text{K}^+$ -stabilized one upon the addition of  $\text{K}^+$ . Fig. S2 depicts the conformational switches.

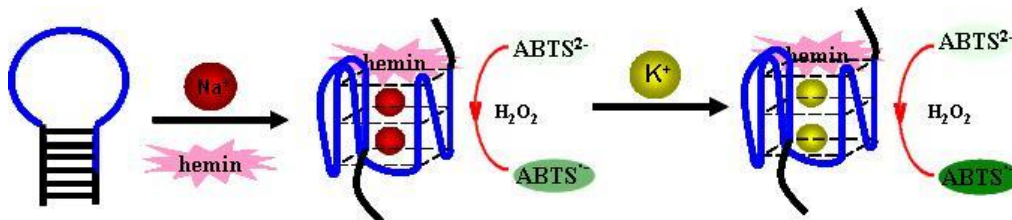

Fig. S2. Schematic of DNA conformational switches and the formed G-quadruplex DNAzyme functions

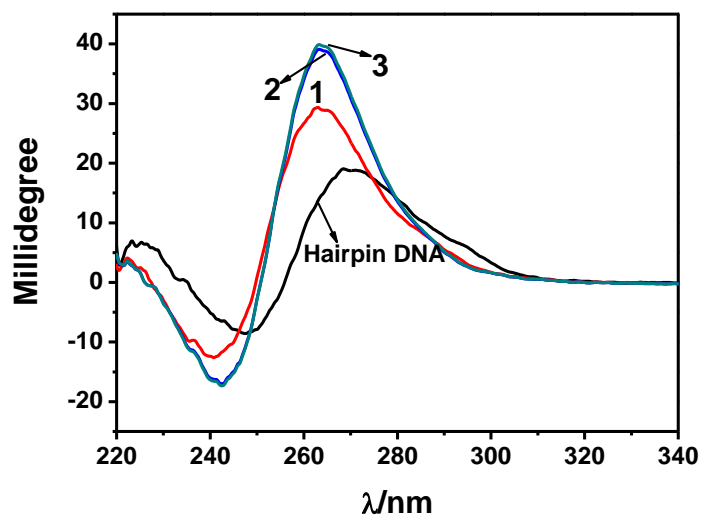

Fig. S3. CD spectra of 4  $\mu\text{M}$  hairpin DNA 1 in 20 mM Tris-ClO<sub>4</sub> buffer (pH = 7.4): (1) adding + 140 mM  $\text{Na}^+$  for 2 h; (2) adding 10 mM  $\text{K}^+$  to (1) for 2 h; (3) adding 10  $\mu\text{M}$   $\text{Pb}^{2+}$  to (1) for 2h, then adding 10 mM  $\text{K}^+$  for 2h.

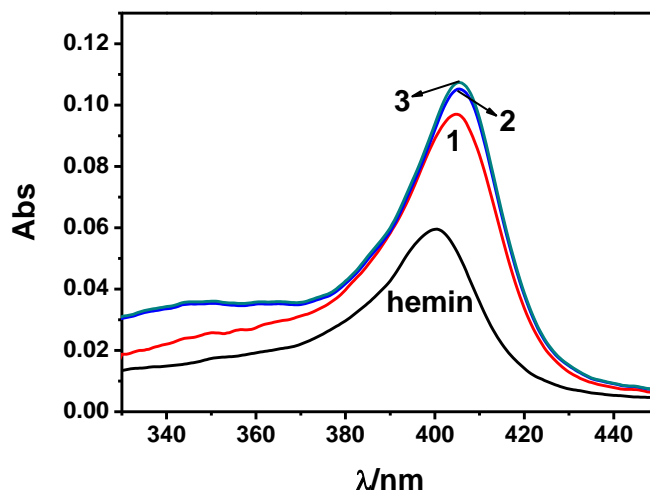

Fig. S4. UV-vis absorption spectra of 1  $\mu\text{M}$  hemin in 20 mM Tris-ClO<sub>4</sub> buffer (pH = 7.4) in the absence and presence of (1) 1  $\mu\text{M}$  Hairpin DNA 1 + 140 mM Na<sup>+</sup>; (2) 10 mM K<sup>+</sup> + (1); (3) 10  $\mu\text{M}$  Pb<sup>2+</sup> + (1), then + 10 mM K<sup>+</sup>.

To test the irreversibility of the process of K<sup>+</sup> substituting Pb<sup>2+</sup> to form K<sup>+</sup>-stabilized G-quadruplex, we record the UV-Vis absorption spectra of Na<sup>+</sup>-stabilized G-quadruplex with sequentially adding K<sup>+</sup> and Pb<sup>2+</sup> at 2 h intervals to catalyze ABTS–H<sub>2</sub>O<sub>2</sub> reaction system. The result is shown in Fig. S5.

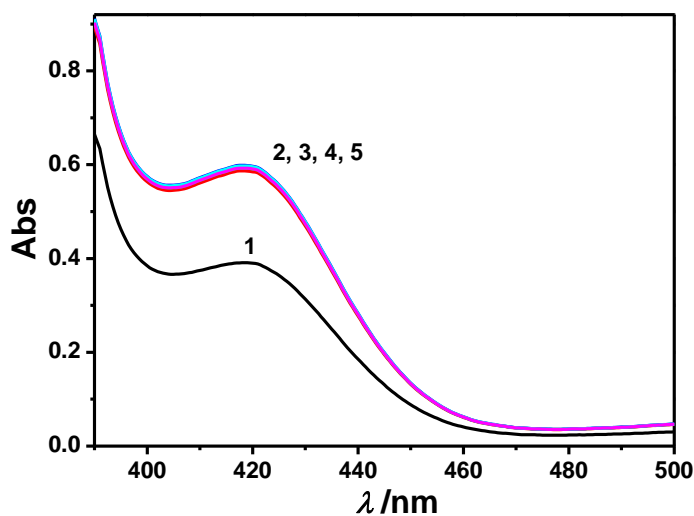

Fig. S5. UV-Vis absorption spectra of the peroxidation product (ABTS•-) at 5 min of the ABTS–H<sub>2</sub>O<sub>2</sub> reaction in Tris-ClO<sub>4</sub> buffer (pH = 7.4) containing 0.1  $\mu\text{M}$  hemin: (1) 0.1  $\mu\text{M}$  hairpin DNA 1 + 140 mM Na<sup>+</sup>; (2) 10 mM K<sup>+</sup> + (1); (3) 100 nM Pb<sup>2+</sup> + (2); (4) 1  $\mu\text{M}$  Pb<sup>2+</sup> + (2); (5) 10  $\mu\text{M}$  Pb<sup>2+</sup> + (2).

To determine if  $K^+$  substituting  $Pb^{2+}$  to form  $K^+$ -stabilized G-quadruplex is also happened for other G-rich aptamers, we perform the control experiments by UV-Vis measurements with only hairpin DNA 1 instead. The selected aptamers with detailed base sequences are shown in Table S1. As shown in Fig. S6, in the presence of 140 mM  $Na^+$  and 0.1  $\mu M$  selected aptamer, weak catalytic activity in ABTS- $H_2O_2$  and hemin system is observed, reflected by weak absorbance of  $ABTS^{\bullet-}$  at 420 nm. Upon addition of  $Pb^{2+}$ , the absorption intensity at 420 nm is decreased, which is corresponding to  $Na^+$  stabilized G-quadruplex transforming to  $Pb^{2+}$ -stabilized one. After the next addition of  $K^+$ , nearly no change is observed in absorption intensity. Therefore, we conclude that the processes of  $K^+$  substituting  $Pb^{2+}$  do not happen for these selected G-rich aptamers, which is consistent with the reported assays.<sup>1-3</sup>

Table S1 The applied DNA sequence (the underlined are complementary pairs) in control experiments

|               |                                     |
|---------------|-------------------------------------|
| T30695        | 5'-GGGTGGGTGGGTGGGT-3'              |
| PS2.M         | 5'-GTGGGTAGGGCGGGTTGG-3'            |
| Hairpin DNA 7 | 5'-GTGGGTAGGGCGGGTTGGACCCAC-3'      |
| PW17          | 5'-GGGTAGGGCGGGTTGGG-3'             |
| Hairpin DNA 8 | 5'-AAGGGTAGGGCGGGTTGGGACCCTT-3'     |
| Hum21         | 5'-GGGTTAGGGTTAGGGTTAGGG-3'         |
| Hairpin DNA 9 | 5'-AAGGGTTAGGGTTAGGGTTAGGGACCCTT-3' |

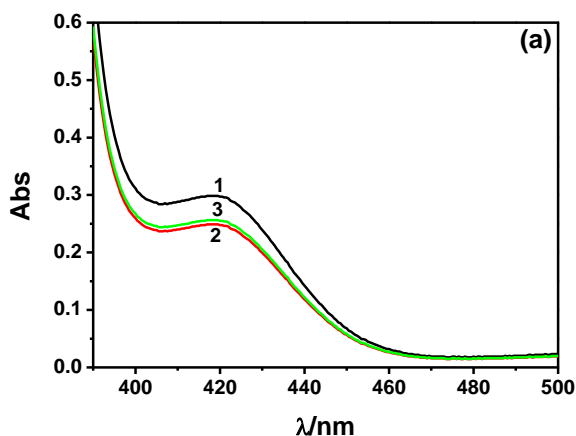

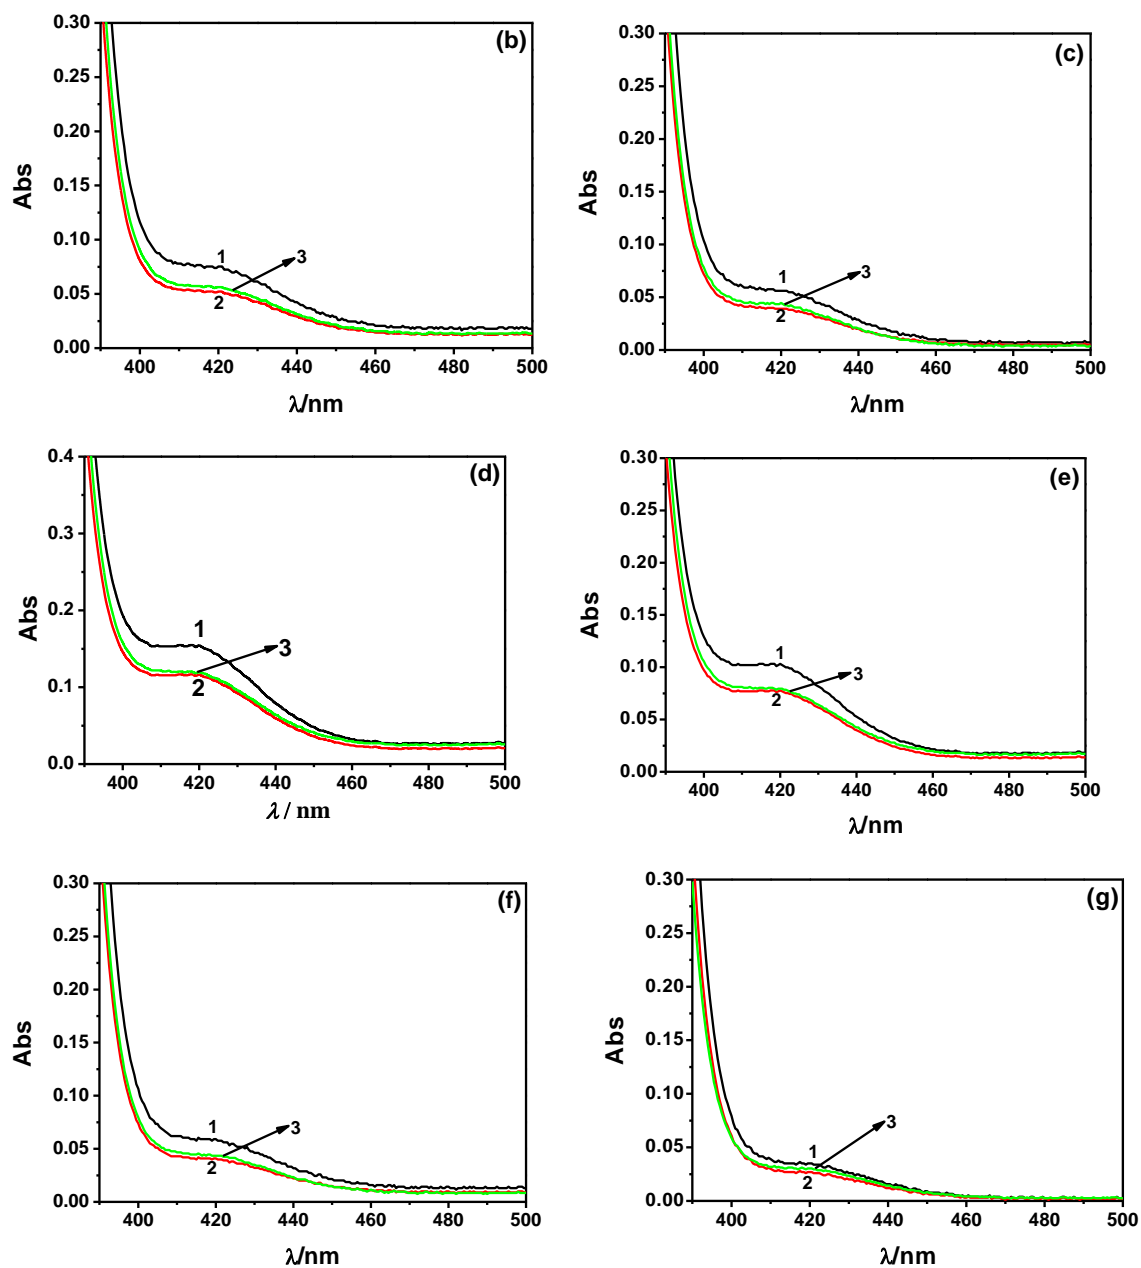

Fig. S6. UV-Vis absorption spectra of the peroxidation product (ABTS<sup>•-</sup>) at 5 min of the ABTS-H<sub>2</sub>O<sub>2</sub> reaction in Tris-ClO<sub>4</sub> buffer (pH = 7.4) containing 0.1 μM hemin and 0.1 μM G-rich aptamer: (a) T30695, (b) PS2.M; (c) hairpin DNA 7; (d) PW17; (e) hairpin DNA 8; (f) Hum21; (g) hairpin DNA 9. (1) in the presence of 140 mM Na<sup>+</sup>, (2) adding 10 μM Pb<sup>2+</sup> to (1), (3) adding 10 mM K<sup>+</sup> to (2).

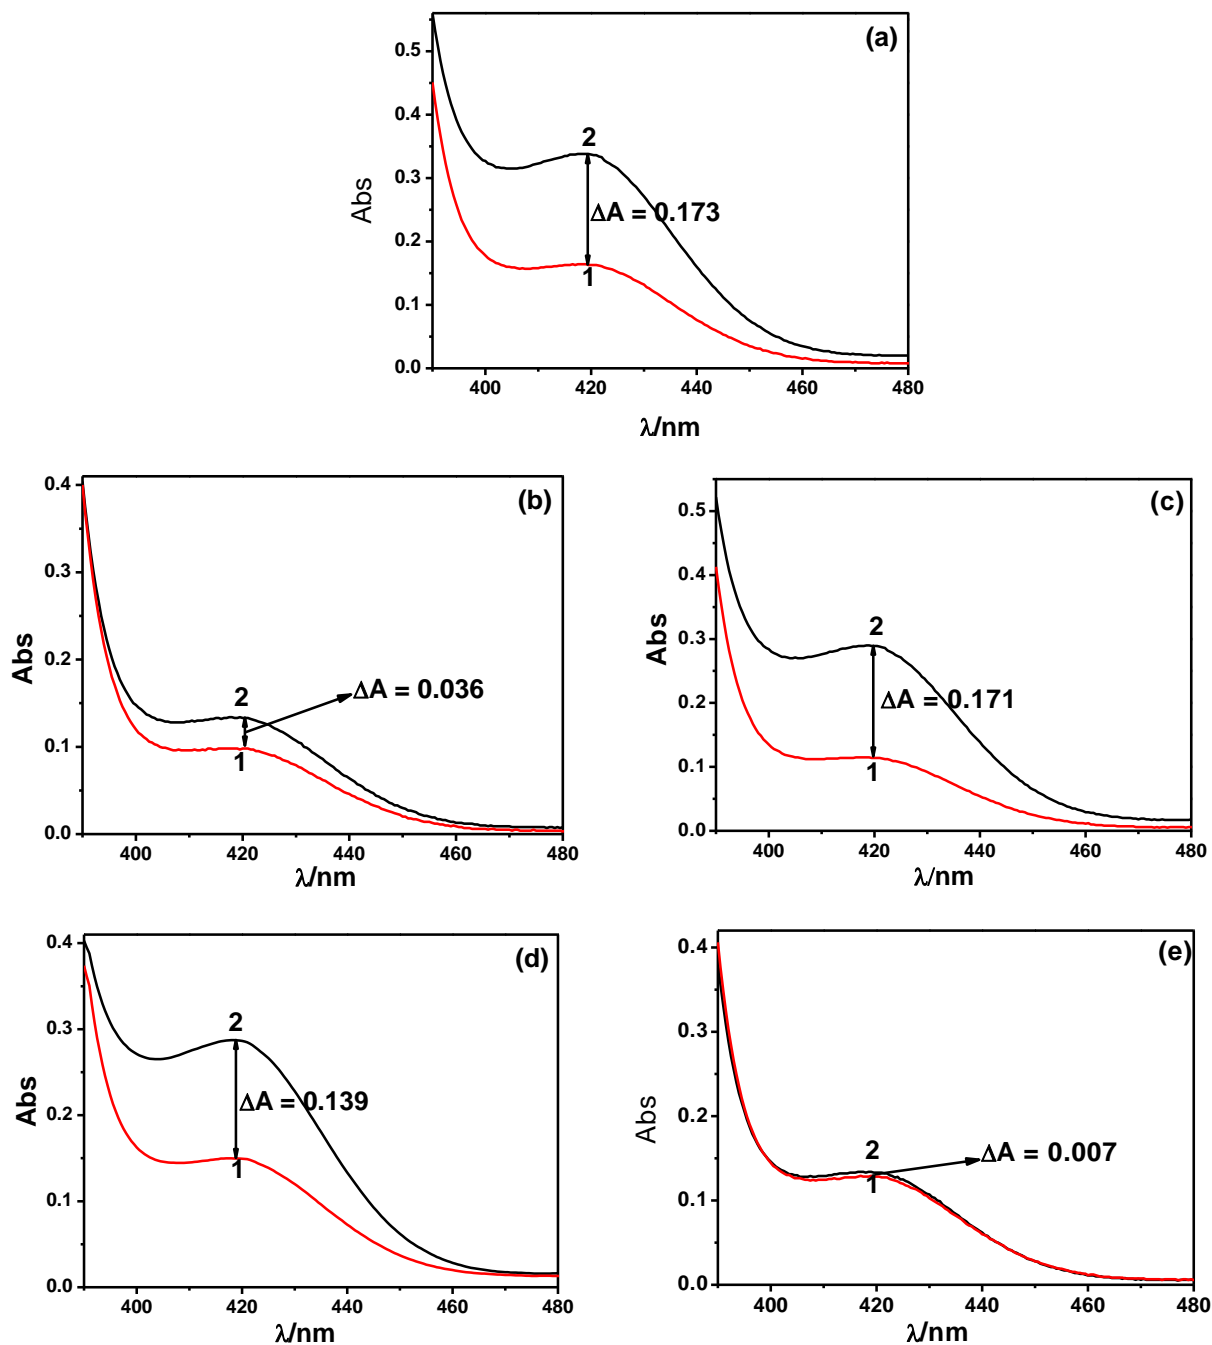

Fig. S7. UV-Vis absorption spectra of the peroxidation product (ABTS<sup>•+</sup>) at 5 min of the ABTS-H<sub>2</sub>O<sub>2</sub> reaction in Tris-ClO<sub>4</sub> buffer (pH = 7.4) containing 0.1 μM hemin, 140 mM Na<sup>+</sup> and 0.1 μM (a) hairpin DNA 2; (b) hairpin DNA 3; (c) hairpin DNA 4; (d) hairpin DNA 5; (e) hairpin DNA 6: (1) adding 10 μM Pb<sup>2+</sup>, (2) adding 10 mM K<sup>+</sup> to (1).

To confirm Na<sup>+</sup>-stabilized G-quadruplex convert to Pb<sup>2+</sup>-stabilized one completely, we record the UV-Vis absorption spectra in 0.1 μM Na<sup>+</sup>-stabilized G-quadruplex after the addition of different concentrations of Pb<sup>2+</sup> in the ABTS-H<sub>2</sub>O<sub>2</sub> system, and the absorbance at 420 nm is

collected, respectively. The relationship of absorbance intensity at 420 nm and the concentrations of  $\text{Pb}^{2+}$  is shown in Fig. S8. We can observe that the absorbance at 420 nm gradually decreases as the concentration of  $\text{Pb}^{2+}$  increases from  $10^{-9}$  M to  $10^{-6}$  M and then remains unchanged when the concentration increases to 10  $\mu\text{M}$ . Thus, 10  $\mu\text{M}$   $\text{Pb}^{2+}$  is sufficient for transforming  $\text{Na}^+$ -stabilized G-quadruplex to  $\text{Pb}^{2+}$ -stabilized one.

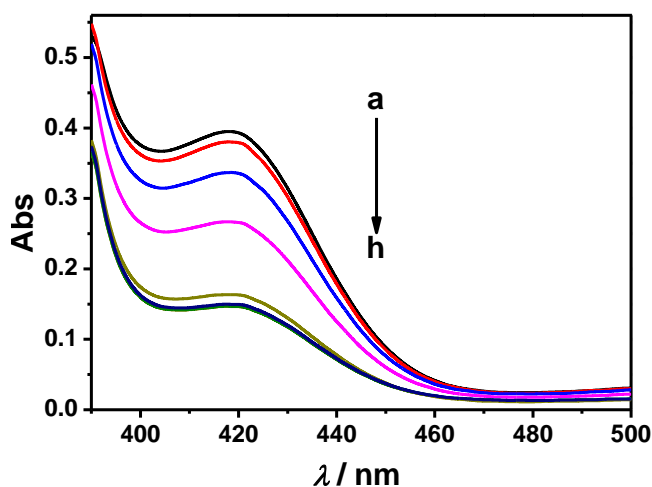

Fig. S8. UV-vis absorption spectra for utilizing 0.1  $\mu\text{M}$  DNase to analyze different concentrations of  $\text{Pb}^{2+}$ : 0 nM (curve a),  $10^{-9}$  M (curve b),  $10^{-8}$  M (curve c),  $10^{-7}$  M (curve d),  $10^{-6}$  M (curve e),  $10^{-5}$  M (curve f),  $5 \times 10^{-4}$  M (curve g),  $10^{-4}$  M (curve h).

## References

- (1) Li, T.; Wang, E. K.; Dong, S. J. *Anal. Chem.* 2010, 82, 7576–7580.
- (2) Li, T.; Wang, E. K.; Dong, S. J. *J. Am. Soc. Chem.*, 2009, 131, 15082-15083.
- (3) Li, T.; Dong, S. J.; Wang, E. K. *J. Am. Soc. Chem.*, 2010, 132, 13156-13157.
